# Supplementary material
Source: PubMed Central journal article supplement (PMC6647331)
Supplement: ao8b03017_si_001.pdf [file ao8b03017_si_001.pdf]

# Comparison of *K-Ras* and *N-Ras* mutagenic hot spots for UVC damage

*Sindhu G. Nair and Glen R. Loppnow\**

Department of Chemistry, University of Alberta, Edmonton, Alberta T6G 2G2, Canada

## Supplementary Material

\*To whom correspondence should be addressed

Email: [glen.loppnow@ualberta.ca](mailto:glen.loppnow@ualberta.ca)

Phone: (780) 492-9704

Fax: (780) 492-8231

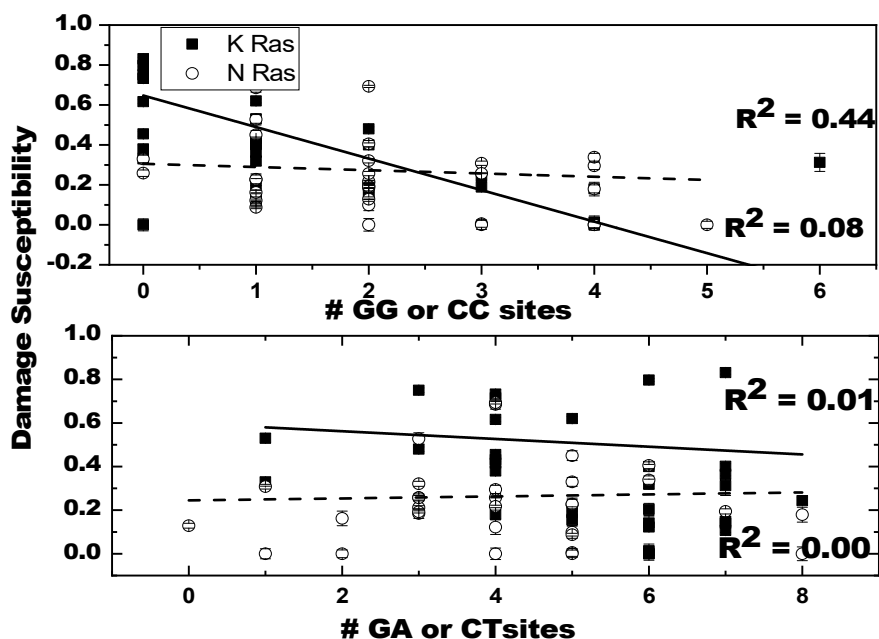

**Figure S1.** UVC-induced damage susceptibility ( $1-F$ ) as a function of number of GG/CC and GA/CT sites. The damage susceptibility on the y-axis are  $1-F$ , where  $F = F_i/F_c$ ,  $F_i$  is the fluorescence intensity of EG-dsDNA upon UVC damage and  $F_c$  is the fluorescence intensity of the undamaged DNA-EG control sample. EG dye fluorescence intensity at 530 nm is measured in the presence of 1  $\mu$ M dsDNA (10 mM Tris, 1 mM EDTA, 10 mM NaCl, pH 7.4). For all the plots, the filled squares represent the damage of K-*Ras* sequences and the open circles represent the damage of N-*Ras* sequences. The solid lines through the filled square points are linear fits for the K-*Ras* sequences with their respective  $R^2$  values indicated in the upper portion of each plot. The dashed line through the empty circle points are linear fits for the N-*Ras* sequences with their  $R^2$  value indicated in the lower portion of each plot.

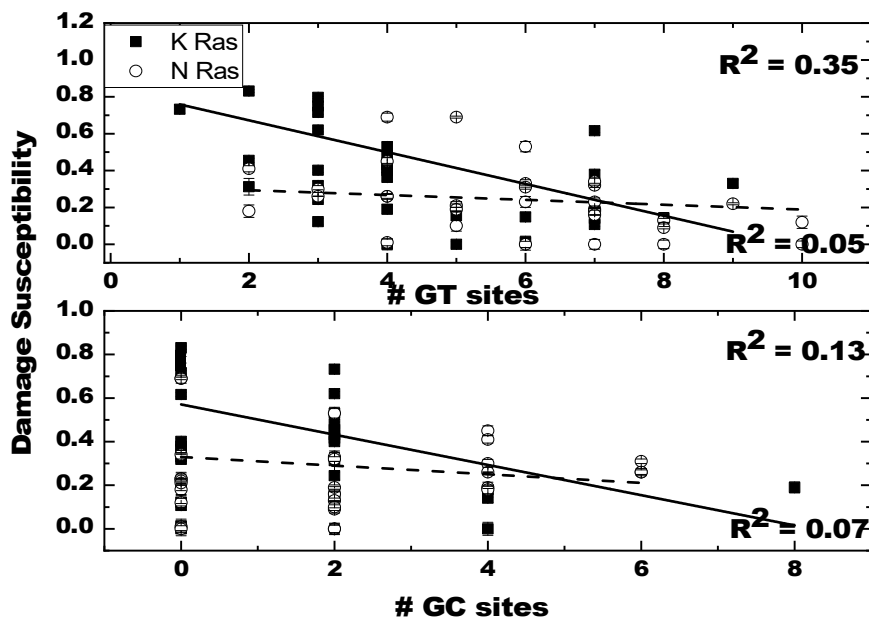

**Figure S2.** UVC-induced damage susceptibility ( $1-F$ ) as a function of number of GT and GC sites. The damage susceptibility on the y-axis are  $1-F$ , where  $F = F_i/F_c$ ,  $F_i$  is the fluorescence intensity of EG-dsDNA upon UVC damage and  $F_c$  is the fluorescence intensity of the undamaged DNA-EG control sample. EG dye fluorescence intensity at 530 nm is measured in the presence of  $1 \mu\text{M}$  dsDNA (10 mM Tris, 1 mM EDTA, 10 mM NaCl, pH 7.4). For all the plots, the filled squares represent the damage of K-*Ras* sequences and the open circles represent the damage of N-*Ras* sequences. The solid lines through the filled square points are linear fits for the K-*Ras* sequences with their respective  $R^2$  values indicated in the upper portion of each plot. The dashed line through the empty circle points are linear fits for the N-*Ras* sequences with their  $R^2$  value indicated in the lower portion of each plot.

**Table S1. K-Ras gene sequence.**

|                                                                                                 |     |     |     |     |     |     |     |     |     |     |     |     |     |     |     |     |     |     |     |     |     |     |     |     |  |     |     |
|-------------------------------------------------------------------------------------------------|-----|-----|-----|-----|-----|-----|-----|-----|-----|-----|-----|-----|-----|-----|-----|-----|-----|-----|-----|-----|-----|-----|-----|-----|--|-----|-----|
| 1                                                                                               | 2   | 3   | 4   | 5   | 6   | 7   | 8   | 9   | 10  | 11  | 12  | 13  | 14  | 15  | 16  | 17  | 18  | 19  | 20  | 21  | 22  | 23  |     |     |  |     |     |
| ATG ACT GAA TAT AAA CTT GTG GTA GTT GGA GCT GGT GGC GTA GGC AAG AGT GCC TTG ACG ATA CAG CTA     |     |     |     |     |     |     |     |     |     |     |     |     |     |     |     |     |     |     |     |     |     |     |     |     |  |     |     |
|                                                                                                 |     |     | 10  |     |     |     | 20  |     |     |     | 30  |     |     |     | 40  |     |     |     | 50  |     |     |     | 60  |     |  |     |     |
| 24                                                                                              | 25  | 26  | 27  | 28  | 29  | 30  | 31  | 32  | 33  | 34  | 35  | 36  | 37  | 38  | 39  | 40  | 41  | 42  | 43  | 44  | 45  | 46  |     |     |  |     |     |
| ATT CAG AAT CAT TTT GTG GAC GAA TAT GAT CCA ACA ATA GAG GAT TCC TAC AGG AAG CAA GTA GTA ATT     |     |     |     |     |     |     |     |     |     |     |     |     |     |     |     |     |     |     |     |     |     |     |     |     |  |     |     |
| 70                                                                                              |     |     |     | 80  |     |     |     | 90  |     |     |     | 100 |     |     |     | 110 |     |     |     | 120 |     |     |     | 130 |  |     |     |
| 47                                                                                              | 48  | 49  | 50  | 51  | 52  | 53  | 54  | 55  | 56  | 57  | 58  | 59  | 60  | 61  | 62  | 63  | 64  | 65  | 66  | 67  | 68  | 69  |     |     |  |     |     |
| GAT GGA GAA ACC TGT CTC TTG GAT ATT CTC GAC ACA GCA GGT CAA GAG GAG TAC AGT GCA ATG AGG GAC     |     |     |     |     |     |     |     |     |     |     |     |     |     |     |     |     |     |     |     |     |     |     |     |     |  |     |     |
| 140                                                                                             | 150 |     |     |     | 160 |     |     |     | 170 |     |     |     | 180 |     |     |     | 190 |     |     |     | 200 |     |     |     |  |     |     |
| 70                                                                                              | 71  | 72  | 73  | 74  | 75  | 76  | 77  | 78  | 79  | 80  | 81  | 82  | 83  | 84  | 85  | 86  | 87  | 88  | 89  | 90  | 91  | 92  | 93  |     |  |     |     |
| CAG TAC ATG AGG ACT GGG GAG GGC TTT CTT TGT GTA TTT GCC ATA AAT AAT ACT AAA TCA TTT GAA GAT ATT |     |     |     |     |     |     |     |     |     |     |     |     |     |     |     |     |     |     |     |     |     |     |     |     |  |     |     |
|                                                                                                 |     |     | 210 |     |     |     | 220 |     |     |     | 230 |     |     |     | 240 |     |     |     | 250 |     |     |     | 260 |     |  | 270 |     |
| 94                                                                                              | 95  | 96  | 97  | 98  | 99  | 100 | 101 | 102 | 103 | 104 | 105 | 106 | 107 | 108 | 109 | 110 | 111 | 112 | 113 | 114 | 115 | 116 |     |     |  |     |     |
| CAC CAT TAT AGA GAA CAA ATT AAA AGA GTT AAG GAC TCT GAA GAT GTA CCT ATG GTC CTA GTA GGA AAT     |     |     |     |     |     |     |     |     |     |     |     |     |     |     |     |     |     |     |     |     |     |     |     |     |  |     |     |
| 280                                                                                             |     |     |     | 290 |     |     |     | 300 |     |     |     | 310 |     |     |     | 320 |     |     |     | 330 |     |     |     | 340 |  |     |     |
| 117                                                                                             | 118 | 119 | 120 | 121 | 122 | 123 | 124 | 125 | 126 | 127 | 128 | 129 | 130 | 131 | 132 | 133 | 134 | 135 | 136 | 137 | 138 | 139 |     |     |  |     |     |
| AAA TGT GAT TTG CCT TCT AGA ACA GTA GAC ACA AAA CAG GCT CAG GAC TTA GCA AGA AGT TAT GGA ATT     |     |     |     |     |     |     |     |     |     |     |     |     |     |     |     |     |     |     |     |     |     |     |     |     |  |     |     |
| 350                                                                                             |     |     |     | 360 |     |     |     | 370 |     |     |     | 380 |     |     |     | 390 |     |     |     | 400 |     |     |     | 410 |  |     |     |
| 140                                                                                             | 141 | 142 | 143 | 144 | 145 | 146 | 147 | 148 | 149 | 150 | 151 | 152 | 153 | 154 | 155 | 156 | 157 | 158 | 159 | 160 | 161 | 162 |     |     |  |     |     |
| CCT TTT ATT GAA ACA TCA GCA AAG ACA AGA CAG GGT GTT GAT GAT GCC TTC TAT ACA TTA GTT CGA GAA     |     |     |     |     |     |     |     |     |     |     |     |     |     |     |     |     |     |     |     |     |     |     |     |     |  |     |     |
|                                                                                                 |     |     | 420 |     |     |     | 430 |     |     |     | 440 |     |     |     | 450 |     |     |     | 460 |     |     |     | 470 |     |  |     | 480 |
| 163                                                                                             | 164 | 165 | 166 | 167 | 168 | 169 | 170 | 171 | 172 | 173 | 174 | 175 | 176 | 177 | 178 | 179 | 180 | 181 | 182 | 183 | 184 | 185 |     |     |  |     |     |
| ATT CGA AAA CAT AAA GAA AAG ATG AGC AAA GAT GGT AAA AAG AAG AAA AAG AAG TCA AAG ACA AAGTGT      |     |     |     |     |     |     |     |     |     |     |     |     |     |     |     |     |     |     |     |     |     |     |     |     |  |     |     |
|                                                                                                 |     |     | 490 |     |     |     | 500 |     |     |     | 510 |     |     |     | 520 |     |     |     | 530 |     |     |     | 540 |     |  |     | 550 |
| 186                                                                                             | 187 | 188 | 189 |     |     |     |     |     |     |     |     |     |     |     |     |     |     |     |     |     |     |     |     |     |  |     |     |
| GTA ATT ATG TAA                                                                                 |     |     |     |     |     |     |     |     |     |     |     |     |     |     |     |     |     |     |     |     |     |     |     |     |  |     |     |
|                                                                                                 |     |     | 560 |     |     |     | 567 |     |     |     |     |     |     |     |     |     |     |     |     |     |     |     |     |     |  |     |     |

The codon number and nucleobase number are represented above and below the sequence line, respectively.

**Table S2 N-*Ras* gene sequence.**

|                                                                                                |     |     |     |     |     |     |     |     |     |     |     |     |     |     |     |     |     |     |     |     |     |     |     |     |     |  |     |
|------------------------------------------------------------------------------------------------|-----|-----|-----|-----|-----|-----|-----|-----|-----|-----|-----|-----|-----|-----|-----|-----|-----|-----|-----|-----|-----|-----|-----|-----|-----|--|-----|
| 1                                                                                              | 2   | 3   | 4   | 5   | 6   | 7   | 8   | 9   | 10  | 11  | 12  | 13  | 14  | 15  | 16  | 17  | 18  | 19  | 20  | 21  | 22  | 23  |     |     |     |  |     |
| ATG ACT GAG TAC AAA CTG GTG GTG GTT GGAGCA GGTGGT GTT GGG AAA AGC GCA CTG ACAATC CAG CTA       |     |     |     |     |     |     |     |     |     |     |     |     |     |     |     |     |     |     |     |     |     |     |     |     |     |  |     |
|                                                                                                |     |     | 10  |     |     |     | 20  |     |     |     | 30  |     |     |     | 40  |     |     |     | 50  |     |     |     | 60  |     |     |  |     |
| 24                                                                                             | 25  | 26  | 27  | 28  | 29  | 30  | 31  | 32  | 33  | 34  | 35  | 36  | 37  | 38  | 39  | 40  | 41  | 42  | 43  | 44  | 45  | 46  | 47  |     |     |  |     |
| ATC CAG AAC CAC TTT GTA GAT GAA TAT GAT CCC ACC ATA GAG GAT TCT TACAGA AAA CAA GTG GTT ATA GAT |     |     |     |     |     |     |     |     |     |     |     |     |     |     |     |     |     |     |     |     |     |     |     |     |     |  |     |
| 70                                                                                             |     |     |     | 80  |     |     |     | 90  |     |     |     | 100 |     |     |     | 110 |     |     |     | 120 |     |     |     | 130 | 140 |  |     |
| 48                                                                                             | 49  | 50  | 51  | 52  | 53  | 54  | 55  | 56  | 57  | 58  | 59  | 60  | 61  | 62  | 63  | 64  | 65  | 66  | 67  | 68  | 69  | 70  | 71  |     |     |  |     |
| GGT GAA ACCTGT TTG TTG GAC ATA CTG GAT ACA GCT GGACAA GAA GAG TAC AGT GCC ATG AGA GAC CAA TAC  |     |     |     |     |     |     |     |     |     |     |     |     |     |     |     |     |     |     |     |     |     |     |     |     |     |  |     |
|                                                                                                |     |     | 150 |     |     |     | 160 |     |     |     | 170 |     |     |     | 180 |     |     |     | 190 |     |     |     | 200 |     |     |  | 210 |
| 72                                                                                             | 73  | 74  | 75  | 76  | 77  | 78  | 79  | 80  | 81  | 82  | 83  | 84  | 85  | 86  | 87  | 88  | 89  | 90  | 91  | 92  | 93  | 94  | 95  |     |     |  |     |
| ATG AGG ACA GGC GAA GGC TTC CTC TGTGTA TTT GCC ATC AAT AAT AGC AAG TCA TTT GCG GAT ATT AAC CTC |     |     |     |     |     |     |     |     |     |     |     |     |     |     |     |     |     |     |     |     |     |     |     |     |     |  |     |
|                                                                                                |     |     | 220 |     |     |     | 230 |     |     |     | 240 |     |     |     | 250 |     |     |     | 260 |     |     |     | 270 |     |     |  | 280 |
| 96                                                                                             | 97  | 98  | 99  | 100 | 101 | 102 | 103 | 104 | 105 | 106 | 107 | 108 | 109 | 110 | 111 | 112 | 113 | 114 | 115 | 116 | 117 | 118 | 119 |     |     |  |     |
| TAC AGG GAG CAG ATTAAG CGA GTA AAA GAC TCG GAT GAT GTA CCTATG GTG CTA GTG GGAAAC AAG TGT GAT   |     |     |     |     |     |     |     |     |     |     |     |     |     |     |     |     |     |     |     |     |     |     |     |     |     |  |     |
|                                                                                                |     |     | 290 |     |     |     | 300 |     |     |     | 310 |     |     |     | 320 |     |     |     | 330 |     |     |     | 340 |     |     |  | 350 |
| 120                                                                                            | 121 | 122 | 123 | 124 | 125 | 126 | 127 | 128 | 129 | 130 | 131 | 132 | 133 | 134 | 135 | 136 | 137 | 138 | 139 | 140 | 141 | 142 | 143 |     |     |  |     |
| TTGCCA ACA AGG ACA GTT GAT ACA AAA CAA GCCCAC GAA CTG GCC AAG AGT TAC GGG ATT CCATTC ATT GAA   |     |     |     |     |     |     |     |     |     |     |     |     |     |     |     |     |     |     |     |     |     |     |     |     |     |  |     |
|                                                                                                |     |     | 360 |     |     |     | 370 |     |     |     | 380 |     |     |     | 390 |     |     |     | 400 |     |     |     | 410 |     |     |  | 420 |
| 144                                                                                            | 145 | 146 | 147 | 148 | 149 | 150 | 151 | 152 | 153 | 154 | 155 | 156 | 157 | 158 | 159 | 160 | 161 | 162 | 163 | 164 | 165 | 166 | 167 |     |     |  |     |
| ACC TCA GCC AAG ACC AGA CAGGGT GTT GAA GAT GCT TTT TAC ACA CTG GTAAGA GAA ATA CGC CAG TAC CGA  |     |     |     |     |     |     |     |     |     |     |     |     |     |     |     |     |     |     |     |     |     |     |     |     |     |  |     |
| 430                                                                                            |     |     |     | 440 |     |     |     | 450 |     |     |     | 460 |     |     |     | 470 |     |     |     | 480 |     |     |     | 490 | 500 |  |     |
| 168                                                                                            | 169 | 170 | 171 | 172 | 173 | 174 | 175 | 176 | 177 | 178 | 179 | 180 | 181 | 182 | 183 | 184 | 185 | 186 | 187 | 188 | 189 | 190 |     |     |     |  |     |
| ATG AAA AAATC AAC AGC AGT GAT GAT GGG ACT CAG GGT TGT ATG GGA TTG CCA TGT GTG GTG ATG TAA      |     |     |     |     |     |     |     |     |     |     |     |     |     |     |     |     |     |     |     |     |     |     |     |     |     |  |     |
|                                                                                                |     |     | 510 |     |     |     | 520 |     |     |     | 530 |     |     |     | 540 |     |     |     | 550 |     |     |     | 560 |     |     |  | 570 |

The codon number and nucleobase number are represented above and below the sequence line, respectively
